# Supplementary material for: Interval arithmetic tools and the precise scalar product in numerical analysis
Source: MDPI journal article supplement (doi:10.3390/membranes12111041), 1990-01-01
Supplement: s1 [file s1]

# Supplementary materials

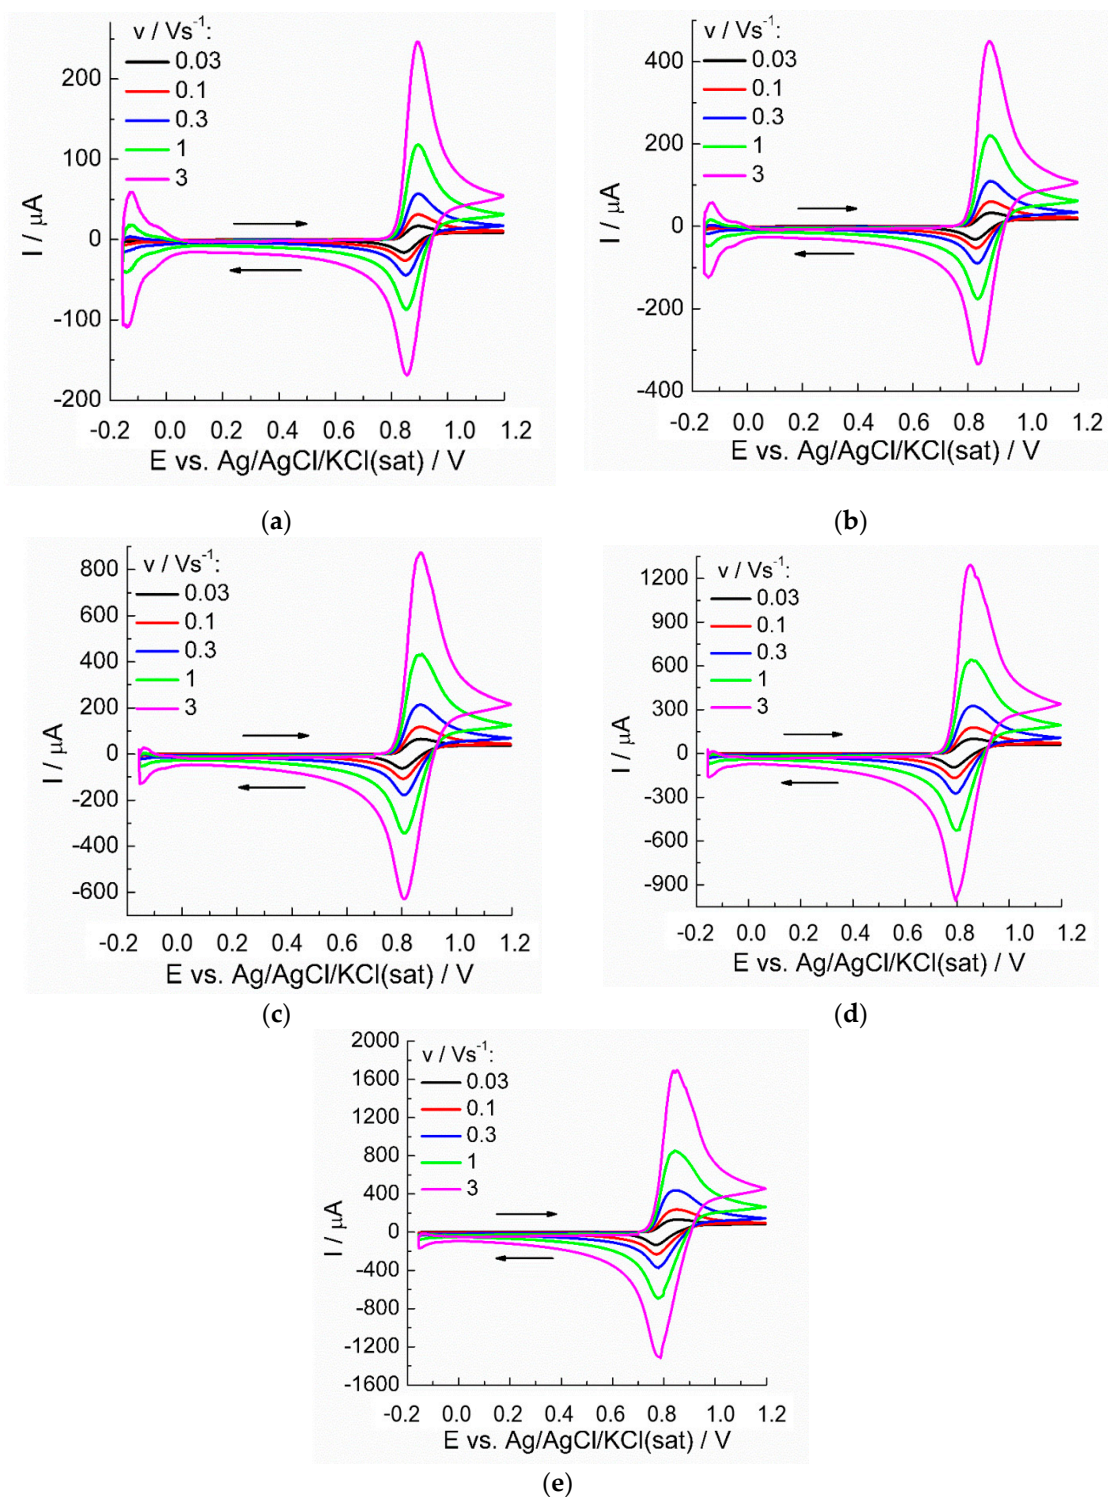

**Figure S1.** Cyclic voltammograms for Pt electrode (diameter: 1 mm) coated with Nafion 212 membrane in contact with 2 M sulfuric acid with addition of HBr,  $c^0$ : 0.125 M (a), 0.25 M (b), 0.5 M (c), 0.75 M (d), 1 M (e). Scan rates indicated in the figures. First cycles.

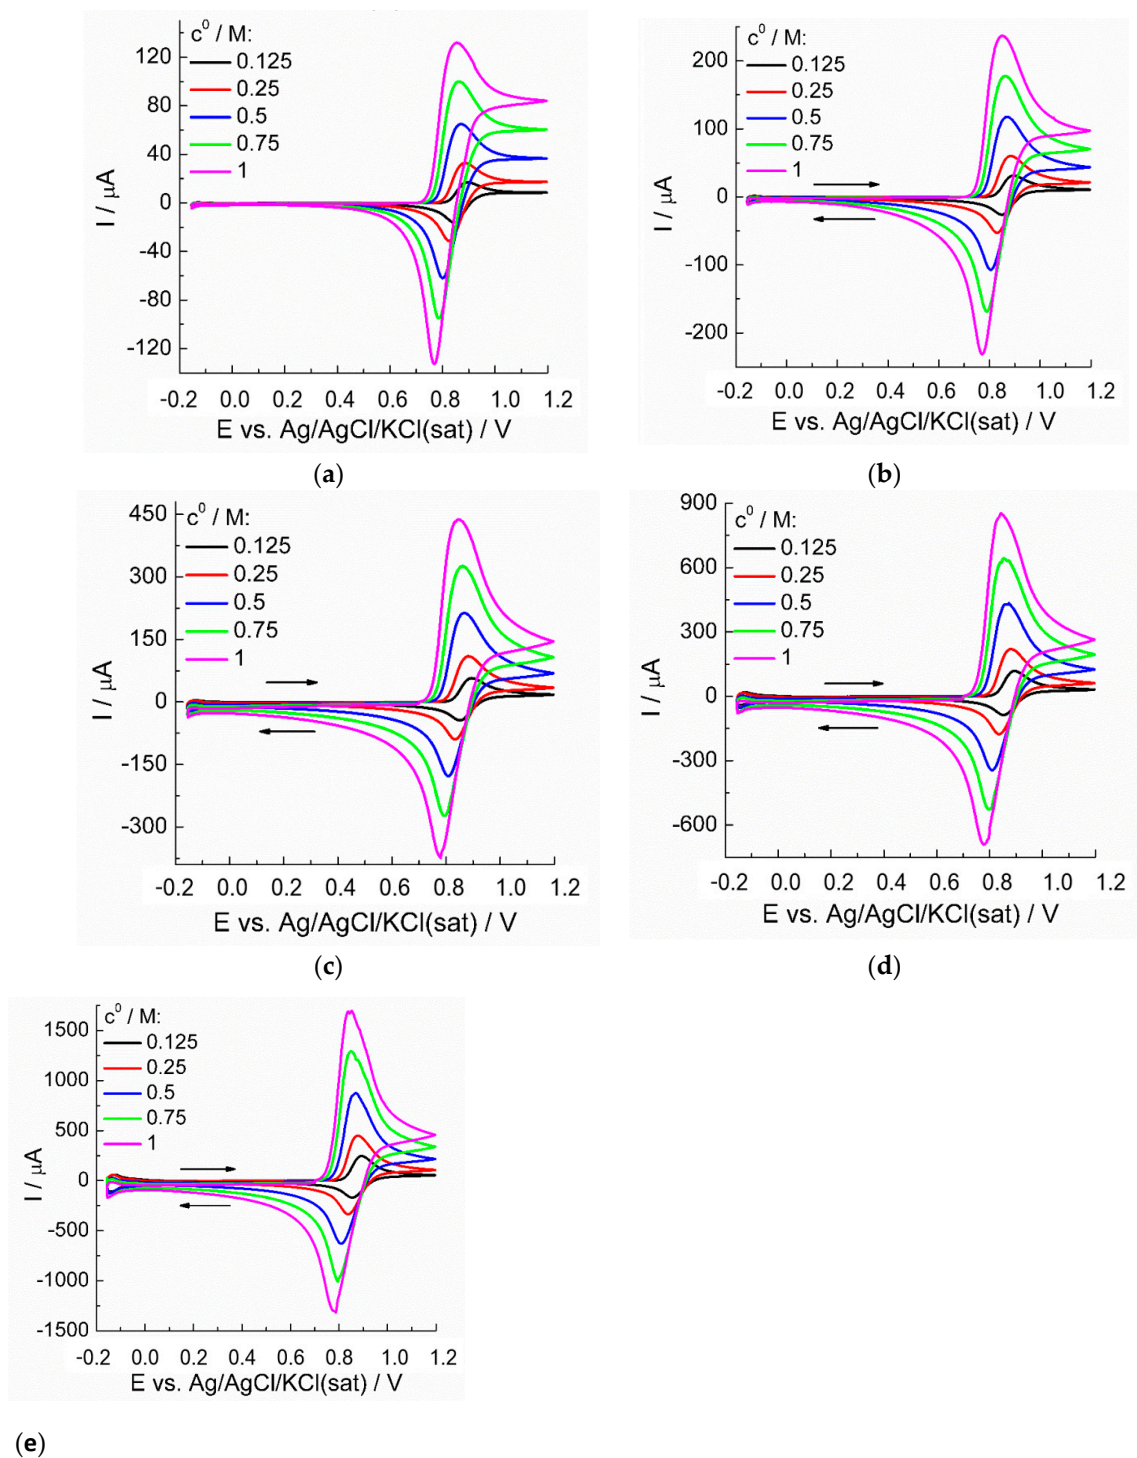

**Figure S2.** Cyclic voltammograms for Pt electrode (diameter: 1 mm) coated with Nafion 212 membrane in contact with 2 M sulfuric acid with addition of HBr for a set of scan rates: 0.03 V/s (a), 0.1 V/s (b), 0.3 V/s (c), 1 V/s (d), 3 V/s (e). Concentrations of HBr,  $c^0$ , indicated in the figures. First cycles.
